# Supplementary material for: The robustness of a thermoset of a main-chain type polybenzoxazine precursor prepared through a strategy of A–A and B–B polycondensation
Source: Royal Society of Chemistry journal article supplement (doi:10.1039/c5ra25619d), 2016-01-01
Supplement: c5ra25619d1.pdf [file c5ra25619d1.pdf]

## Supporting Information

### The robustness of thermoset of main-chain type polybenzoxazine precursor prepared through a strategy of A-A and B-B polycondensation

Meng Wei Wang, Ru Jong Jeng,\* Ching Hsuan Lin\*

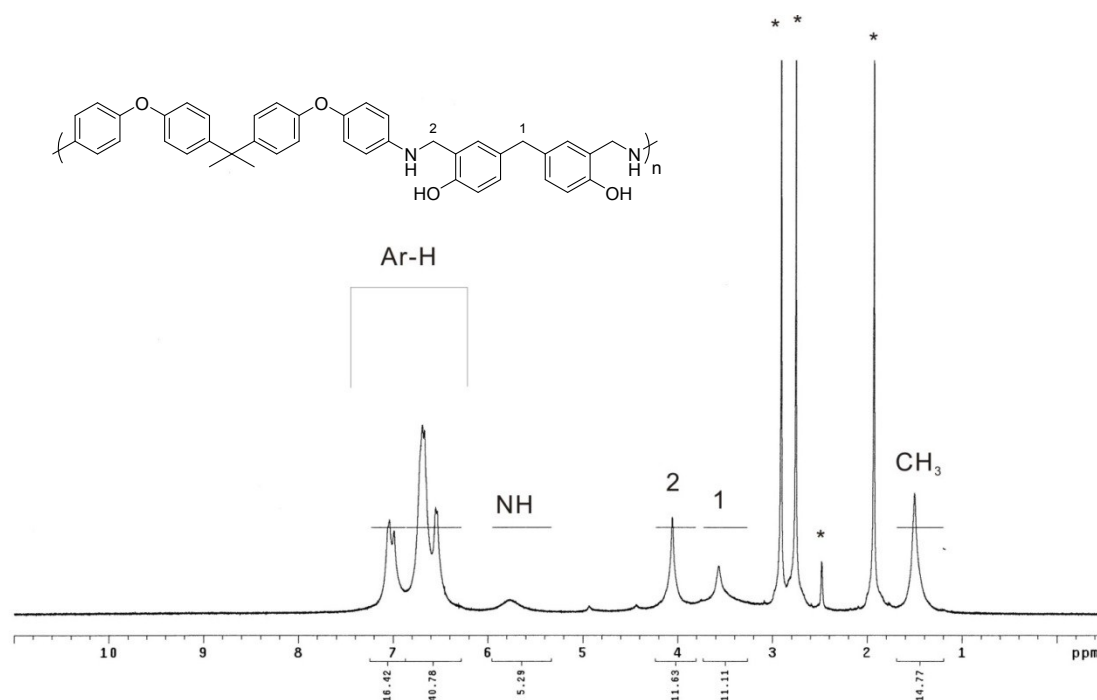

Figure S1. <sup>1</sup>H-NMR spectrum of pre-P(BF-bapp)-1 in DMSO-*d*<sub>6</sub>.

Table S1. Solvent effect on the synthesis of P(BF-bapp)-2.

| Run | Solvent                    | Time (h) | Temperature (°C) | Reaction Status |
|-----|----------------------------|----------|------------------|-----------------|
| 1   | Chloroform                 | 5        | 60 (reflux)      | gelation        |
| 2   | 1,4-Dioxane                | 2        | 80               | gelation        |
| 3   | Toluene                    | 0.5      | 80               | gelation        |
| 4   | Toluene/Ethanol (2/1, v/v) | 15       | 80               | homogeneity     |

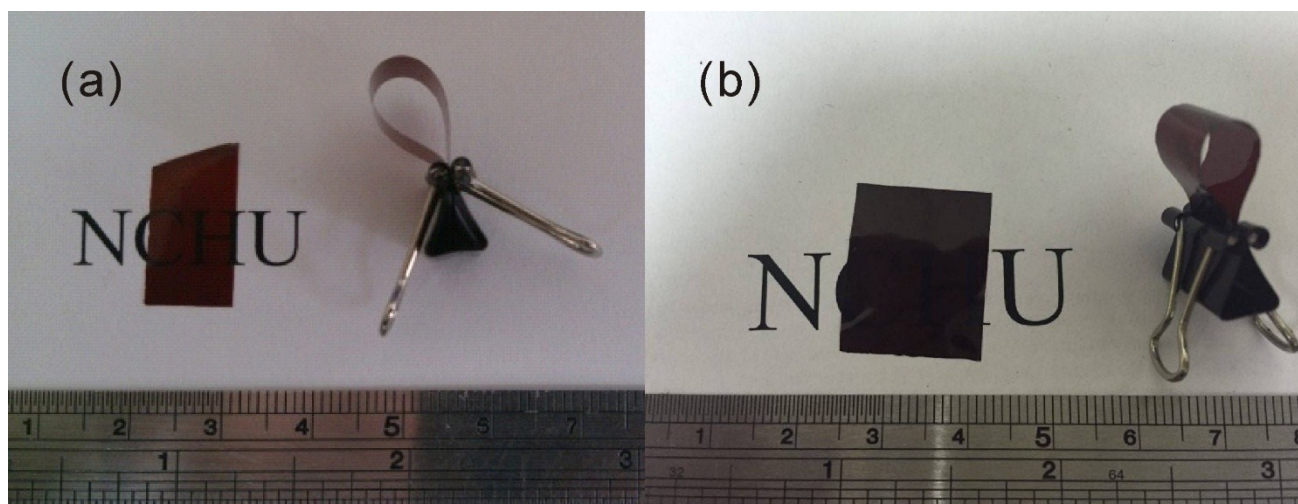

Figure S2. Photos of (a) C-P(BF-bapp)-1 and (b) C-P(BF-bapp)-2.
